# Supplementary material for: Cerebral Ischemic Lesions after Transcatheter Aortic Valve Implantation in Patients with Non-Calcific Aortic Stenosis
Source: MDPI journal article supplement (doi:10.3390/jcm11216502), 2022-11-02
Supplement: s1 [file s1]

**Table S1. Antithrombotic therapy before and after TAVI**

|                                 | <b>Non-calcific AS<br/>n = 34</b> | <b>Calcific AS<br/>n = 294</b> | <b>P Value</b> |
|---------------------------------|-----------------------------------|--------------------------------|----------------|
| Medication before TAVI          | -                                 | -                              | 0.535          |
| No antithrombotic therapy       | 7(20.6%)                          | 96(32.7%)                      | -              |
| Antiplatelet                    | 23(67.6%)                         | 168(57.1%)                     | -              |
| Anticoagulant                   | 3(8.8%)                           | 20(6.8%)                       | -              |
| Antiplatelet plus anticoagulant | 1(2.9%)                           | 10(3.4%)                       | -              |
| Medication after TAVI           | -                                 | -                              | 0.688          |
| No antithrombotic therapy       | 0(0%)                             | 1(0.3%)                        | -              |
| Antiplatelet                    | 26(76.5%)                         | 244(83.0%)                     | -              |
| Anticoagulant                   | 6(17.6%)                          | 32(10.9%)                      | -              |
| Antiplatelet plus anticoagulant | 2(5.9%)                           | 17(5.8%)                       | -              |

TAVI = transcatheter aortic valve implantation

**Table S2. Clinical Outcomes at 30-day Follow up**

|                                      | <b>Non-calcific AS</b><br><b>n = 34</b> | <b>Calcific AS</b><br><b>n = 294</b> | <b>P Value</b> |
|--------------------------------------|-----------------------------------------|--------------------------------------|----------------|
| All-cause Mortality                  | 0(0%)                                   | 1(0.3%)                              | 1.000          |
| Cardiovascular mortality             | 0(0%)                                   | 1(0.3%)                              | 1.000          |
| Myocardial infarction                | 0(0%)                                   | 1(0.3%)                              | 1.000          |
| Stroke                               | 0(0%)                                   | 9(3.1%)                              | 0.631          |
| Disabling stroke                     | 0(0%)                                   | 3(1.0%)                              | 1.000          |
| Non-disabling stroke                 | 0(0%)                                   | 6(2.0%)                              | 0.869          |
| Life-threatening bleeding            | 0(0%)                                   | 1(0.3%)                              | 1.000          |
| New permanent pacemaker implantation | 0(0%)                                   | 11(3.7%)                             | 0.519          |
| New-onset atrial fibrillation        | 2(5.9%)                                 | 10(3.4%)                             | 0.805          |
| NYHA class III/IV                    | 2(5.9%)                                 | 21(7.3%)                             | 1.000          |
| <b>Echocardiographic data</b>        |                                         |                                      |                |
| LVEF, %                              | 62.4(58.1-66.0)                         | 61.0(55.1-65.0)                      | 0.161          |
| Max velocity, m/s                    | 2.25±0.38                               | 2.30±0.53                            | 0.426          |
| Mean gradient, mmHg                  | 11.0(8.8-13.3)                          | 11.0(7.0-14.0)                       | 0.999          |
| Aortic valve area, cm <sup>2</sup>   | 1.46(1.20-1.72)                         | 1.57(1.35-1.79)                      | 0.086          |
| ≥ mild paravalvular leakage          | 14(41.2%)                               | 178(63.6%)                           | <b>0.011</b>   |
| ≥ moderate paravalvular leakage      | 0(0%)                                   | 15(5.4%)                             | 0.338          |

Data was presented as n (%) or median (interquartile range, IQR). p Values in bold are statistically significant. LVEF = left ventricular ejection fraction; NYHA = New York Heart Association

**Table S3. Univariate logistic regression analysis of new CILs.**

|                                                    | Univariate regression |                  |
|----------------------------------------------------|-----------------------|------------------|
|                                                    | P value               | OR (95%CI)       |
| Female sex                                         | 0.801                 | 1.08(0.59-1.97)  |
| Obesity                                            | 0.598                 | 0.65(0.13-3.22)  |
| Previous stroke                                    | 0.539                 | 1.92(0.24-15.31) |
| Prior atrial fibrillation/flutter                  | 0.975                 | 0.99(0.43-2.25)  |
| LVEF, per 1 percent                                | 0.340                 | 1.01(0.99-1.03)  |
| LVEF $\leq$ 40%                                    | 0.993                 | 1.00(0.42-2.38)  |
| Medication before TAVI                             | 0.420                 | -                |
| No antithrombotic therapy                          | Ref                   | Ref              |
| Antiplatelet                                       | 0.169                 | 0.61(0.30-1.24)  |
| Anticoagulant                                      | 0.475                 | 0.48(0.15-1.51)  |
| Antiplatelet plus anticoagulant                    | 0.800                 | 1.32(0.16-11.23) |
| Medication after TAVI*                             | 0.148                 | -                |
| Antiplatelet                                       | Ref                   | Ref              |
| Anticoagulant                                      | 0.128                 | 0.53(0.23-1.20)  |
| Antiplatelet plus anticoagulant                    | 0.156                 | 0.46(0.16-1.35)  |
| Non-calcific AS                                    | <b>0.026</b>          | 0.40(0.18-0.90)  |
| Valve calcification severity                       |                       |                  |
| , per one degree                                   | 0.082                 | 1.34(0.96-1.85)  |
| Calcium volume score $\geq 494 \text{ mm}^3$       | <b>0.047</b>          | 1.85(1.01-3.39)  |
| Bicuspid aortic stenosis                           | 0.063                 | 1.76(0.97-3.20)  |
| Diabetes mellitus                                  | 0.110                 | 0.59(0.30-1.13)  |
| Dyslipidemia                                       | 0.135                 | 2.53(0.75-8.53)  |
| Max velocity $\geq 5 \text{ m/s}$                  | 0.070                 | 1.82(0.95-3.46)  |
| Pure AS <sup>†</sup>                               | <b>0.050</b>          | 3.35(1.00-11.21) |
| Moderate/severe MR                                 | <b>0.008</b>          | 0.43(0.23-0.80)  |
| Postdilatation                                     | 0.384                 | 1.31(0.71-2.42)  |
| Second valve implantation                          | 0.203                 | 2.60(0.60-11.31) |
| Oversizing ratio by annulus perimeter $\geq 6.9\%$ | 0.105                 | 1.64(0.90-2.98)  |
| MRI time                                           | 0.078                 | 0.88(0.76-1.01)  |

\* Since only 1 patient received no antithrombotic therapy after TAVI for the consideration of bleeding risk, this patient was not included in the analysis of medication after TAVI. <sup>†</sup> Pure AS represented severe aortic stenosis without more than trace aortic regurgitation; Obesity was defined as BMI > 30 kg/m<sup>2</sup>. ROC curve analysis were performed for important continuous variables (calcium volume score, max velocity, oversizing ratio by annulus perimeter) and the optimal cut-off were determined using Youden Index.

AS = aortic stenosis; MR = mitral regurgitation;

**Table S4. Univariate and multivariate logistic regression analysis of new CILs (Include valve calcification severity)**

|                                                       | Univariate regression |                  | Multivariate regression |                  |
|-------------------------------------------------------|-----------------------|------------------|-------------------------|------------------|
|                                                       | P value               | OR (95%CI)       | P value                 | OR (95%CI)       |
| Valve calcification severity<br>, per one degree      | 0.082                 | 1.34(0.96-1.85)  | <b>0.037</b>            | 1.47(1.02-2.11)  |
| Bicuspid aortic stenosis                              | 0.063                 | 1.76(0.97-3.20)  | -                       | -                |
| Diabetes mellitus                                     | 0.110                 | 0.59(0.30-1.13)  | -                       | -                |
| Dyslipidemia                                          | 0.135                 | 2.53(0.75-8.53)  | -                       | -                |
| Max velocity $\geq 5$ m/s                             | 0.070                 | 1.82(0.95-3.46)  | 0.085                   | 1.81(0.92-3.55)  |
| Pure AS*                                              | <b>0.050</b>          | 3.35(1.00-11.21) | 0.076                   | 3.04(0.89-10.39) |
| Moderate/severe MR                                    | <b>0.008</b>          | 0.43(0.23-0.80)  | <b>0.016</b>            | 0.45(0.24-0.86)  |
| Oversizing ratio by annulus<br>perimeter $\geq 6.9\%$ | 0.105                 | 1.64(0.90-2.98)  | <b>0.026</b>            | 2.10(1.09-4.02)  |
| MRI time                                              | 0.078                 | 0.88(0.76-1.01)  | -                       | -                |

The variables with a p value  $<0.20$  in univariate analysis were included in multivariate logistic regression analysis using a backward likelihood ratio method. No multicollinearity existed among the variables in multivariate regression model. ROC curve analysis were performed for important continuous variables and the optimal cut-off were determined using Youden Index.

\* Pure AS represented severe aortic stenosis without more than trace aortic regurgitation; AS = aortic stenosis; MR = mitral regurgitation;

**Table S5. Univariate and multivariate logistic regression analysis of new CILs (Include calcium volume score)**

|                                                    | Univariate regression |                  | Multivariate regression |                  |
|----------------------------------------------------|-----------------------|------------------|-------------------------|------------------|
|                                                    | P value               | OR (95%CI)       | P value                 | OR (95%CI)       |
| Calcium volume score $\geq 494 \text{ mm}^3$       | <b>0.047</b>          | 1.85(1.01-3.39)  | <b>0.013</b>            | 2.30(1.19-4.43)  |
| Bicuspid aortic stenosis                           | 0.063                 | 1.76(0.97-3.20)  | -                       | -                |
| Diabetes mellitus                                  | 0.110                 | 0.59(0.30-1.13)  | -                       | -                |
| Dyslipidemia                                       | 0.135                 | 2.53(0.75-8.53)  | -                       | -                |
| Max velocity $\geq 5 \text{ m/s}$                  | 0.070                 | 1.82(0.95-3.46)  | -                       | -                |
| Pure AS*                                           | <b>0.050</b>          | 3.35(1.00-11.21) | 0.075                   | 3.06(0.90-10.46) |
| Moderate/severe MR                                 | <b>0.008</b>          | 0.43(0.23-0.80)  | <b>0.026</b>            | 0.48(0.26-0.92)  |
| Oversizing ratio by annulus perimeter $\geq 6.9\%$ | 0.105                 | 1.64(0.90-2.98)  | <b>0.029</b>            | 2.06(1.08-3.95)  |
| MRI time                                           | 0.078                 | 0.88(0.76-1.01)  | -                       | -                |

The variables with a p value  $< 0.20$  in univariate analysis were included in multivariate logistic regression analysis using a backward likelihood ratio method. No multicollinearity existed among the variables in multivariate regression model. ROC curve analysis were performed for important continuous variables and the optimal cut-off were determined using Youden Index.

\* Pure AS represented severe aortic stenosis without more than trace aortic regurgitation; AS = aortic stenosis; MR = mitral regurgitation;
